# Supplementary material for: Fractal dimension of the aortic annulus: a novel predictor of paravalvular leak after transcatheter aortic valve implantation
Source: Springer Nature journal article supplement (doi:10.1007/s10554-022-02657-1), 2022-06-24
Supplement: MOESM1 [file 23203024]

## Supplementary Data

Stachel et al.: Fractal dimension of the aortic annulus: a novel predictor of paravalvular leak after transcatheter aortic valve implantation

**Supplementary Table 1**

|                      | Composite endpoint not reached at 30 days | Composite endpoint reached at 30 days | p=    |
|----------------------|-------------------------------------------|---------------------------------------|-------|
| All prosthesis types |                                           |                                       |       |
| FD_annulus_diastolic | 1.0381 (1.0208-1.0637)                    | 1.0510 (1.0253-1.0606)                | 0.278 |
| FD_LVOT_diastolic    | 1.0394 (1.0229-1.0539)                    | 1.0482 (1.0260-1.0672)                | 0.432 |
| FD_annulus_systolic  | 1.0398 (1.0220-1.0616)                    | 1.0301 (1.0141-1.0560)                | 0.282 |
| FD_LVOT_systolic     | 1.0368 (1.0202-1.0569)                    | 1.0510 (1.0286-1.0611)                | 0.100 |
| BEV                  |                                           |                                       |       |
| FD_annulus_diastolic | 1.0382 (1.0230-1.0634)                    | 1.0342 (1.0261-1.0522)                | 0.836 |
| FD_LVOT_diastolic    | 1.0463 (1.0233-1.0537)                    | 1.0416 (1.0082-1.0450)                | 0.296 |

|     |                      |                        |                        |       |
|-----|----------------------|------------------------|------------------------|-------|
|     | FD_annulus_systolic  | 1.0399 (1.0198-1.0598) | 1.0268 (1.0188-1.0560) | 0.487 |
|     | FD_LVOT_systolic     | 1.0394 (1.0184-1.0609) | 1.0554 (1.0508-1.0584) | 0.207 |
| SEV |                      |                        |                        |       |
|     | FD_annulus_diastolic | 1.0331 (1.0208-1.0637) | 1.0554 (1.0248-1.0731) | 0.180 |
|     | FD_LVOT_diastolic    | 1.0374 (1.0225-1.0561) | 1.0569 (1.0360-1.0691) | 0.153 |
|     | FD_annulus_systolic  | 1.0395 (1.0249-1.0616) | 1.0357 (1.0110-1.0815) | 0.449 |
|     | FD_LVOT_systolic     | 1.0349 (1.0218-1.0560) | 1.0437 (1.0284-1.0677) | 0.269 |

Supplementary table S1.

Title: FD in a composite endpoint of all-cause death, stroke, moderate or severe PVR and permanent pacemaker implantation

Caption: FD is compared in patients reaching a composite endpoint at 30 days. Data are presented median (IQR).

**Supplementary Table 2**

|                               | FD_annulus_diastolic            |       |
|-------------------------------|---------------------------------|-------|
|                               | Pearson correlation coefficient | p=    |
| LVOT eccentricity             | 0.225                           | 0.123 |
| LVOT nontubularity            | -0.149                          | 0.157 |
| Annulus eccentricity          | 0.337                           | 0.001 |
| Annulus distensibility        | -0.098                          | 0.517 |
| LVOT calcium                  | 0.054                           | 0.607 |
| LVOT calcium density          | 0.031                           | 0.767 |
| LVOT eccentricity of calcium  | 0.069                           | 0.604 |
| LVOT NCC calcium              | 0.120                           | 0.252 |
| LVOT calcium semiquantitative | 0.207                           | 0.045 |
| Annulus calcium               | 0.143                           | 0.169 |
| Annulus calcium density       | 0.096                           | 0.356 |
| Annulus NCC calcium           | 0.136                           | 0.192 |
| Aortic valve calcium          | 0.016                           | 0.882 |
| Aortic valve NCC calcium      | -0.030                          | 0.775 |
| Aortic valve RCC calcium      | -0.020                          | 0.851 |

|                                          |       |       |
|------------------------------------------|-------|-------|
| Aortic valve LCC calcium                 | 0.071 | 0.497 |
| Aortic valve calcium<br>semiquantitative | 0.009 | 0.932 |

Supplementary table S2.

Title: Correlation between FD and conventional anatomic measures

Caption: NCC, non-coronary cusp of the aortic valve, RCC, right-coronary cusp, LCC, left-coronary cusp.
